# Supplementary material
Source: ML conference proceedings conference paper supplement (https://openreview.net/forum?id=SEef8wIj5lc)

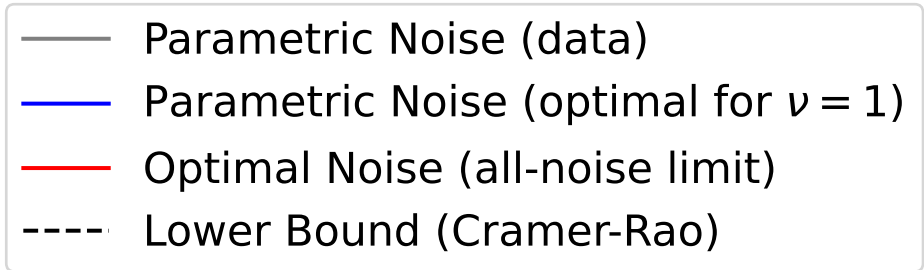

Gaussian Mean Model

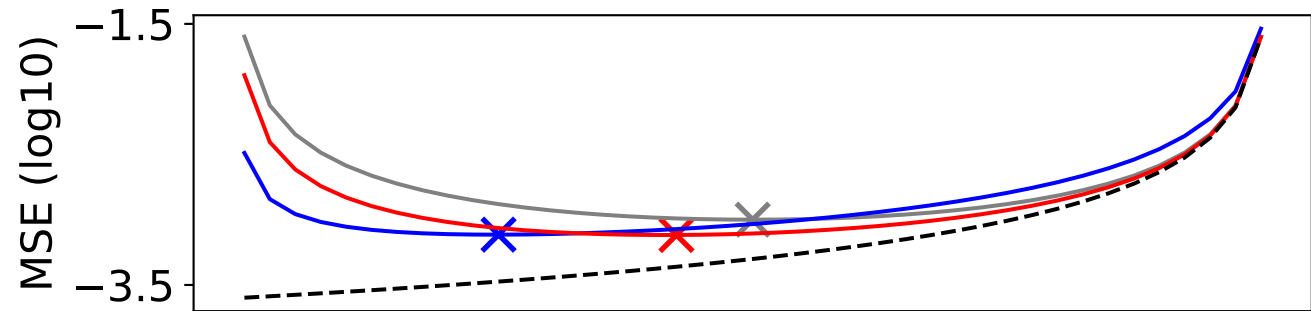

Gaussian Variance Model

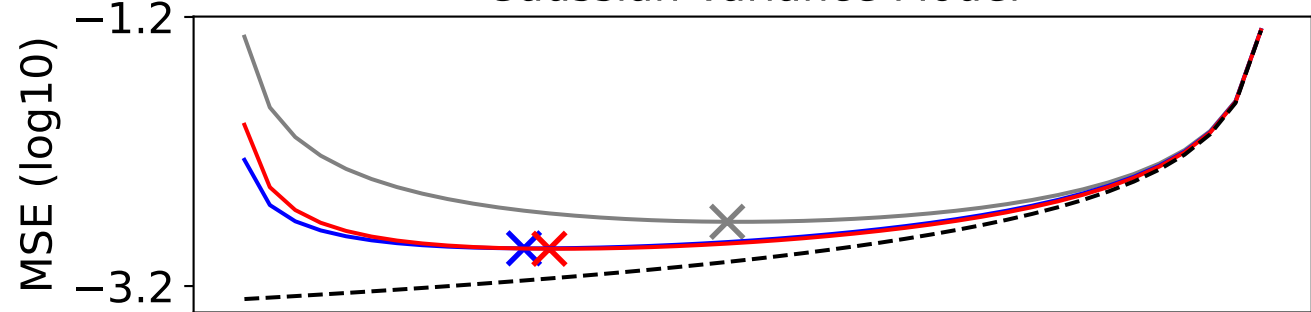

Gaussian Correlation Model

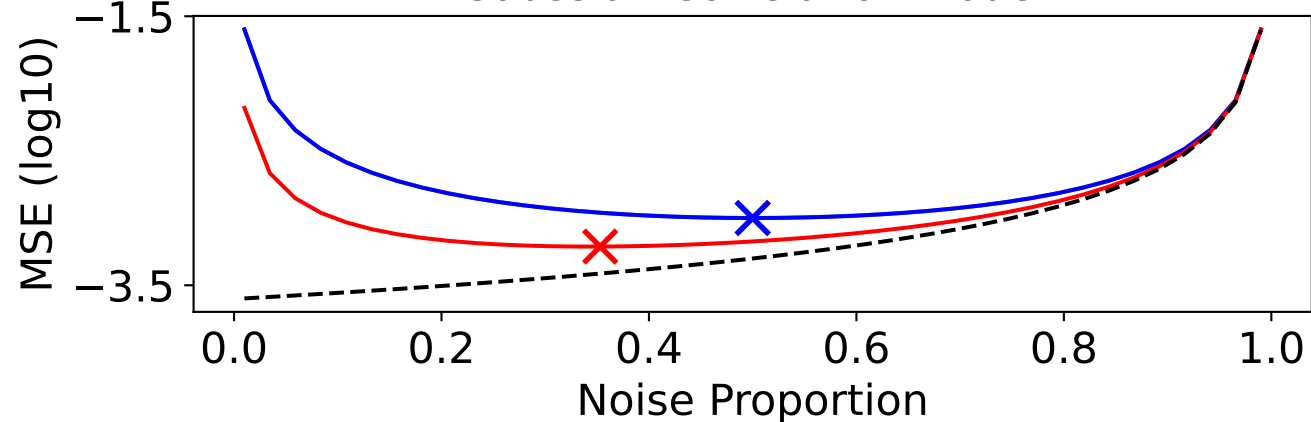

Supplement: supplementary_material [file attachment]

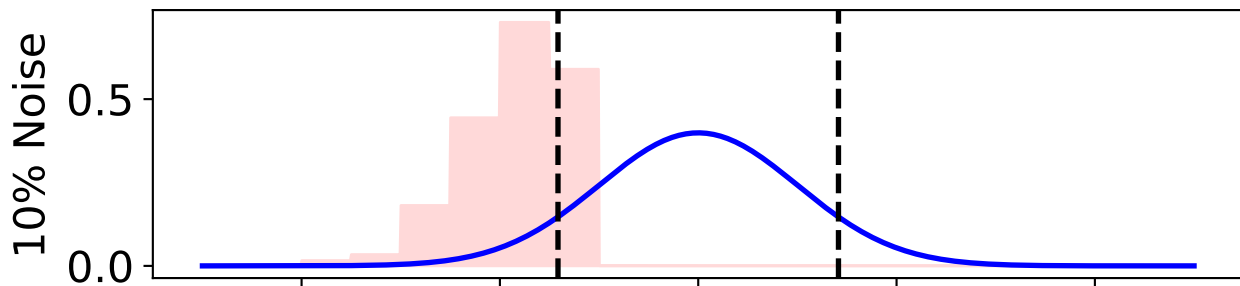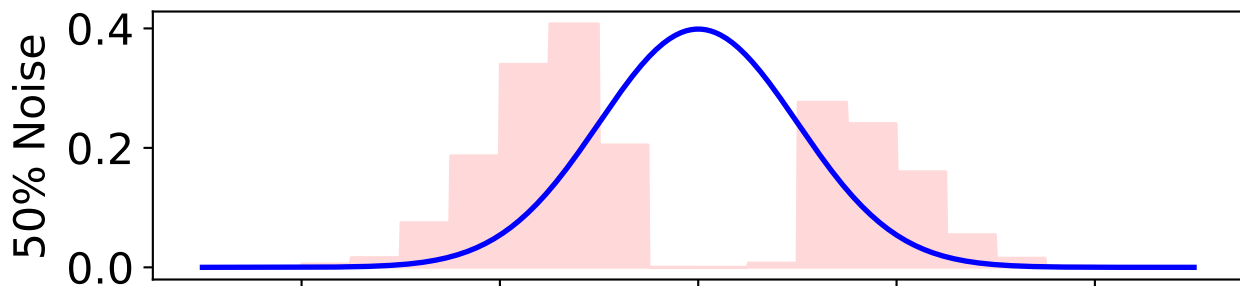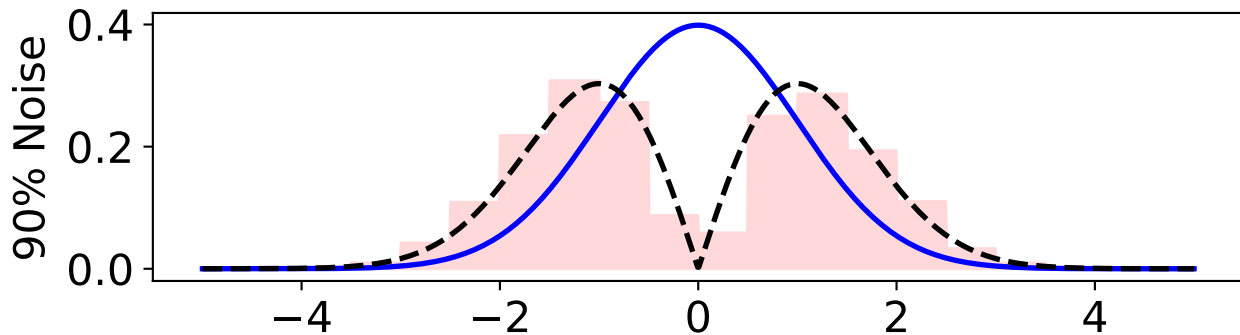

— data    --- noise (predicted)    noise

Supplement: supplementary_material [file attachment]

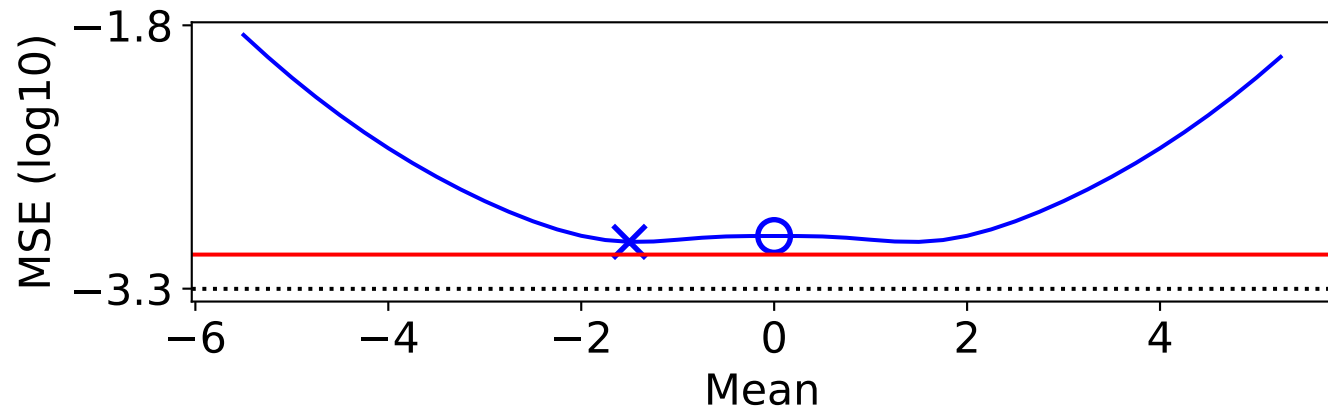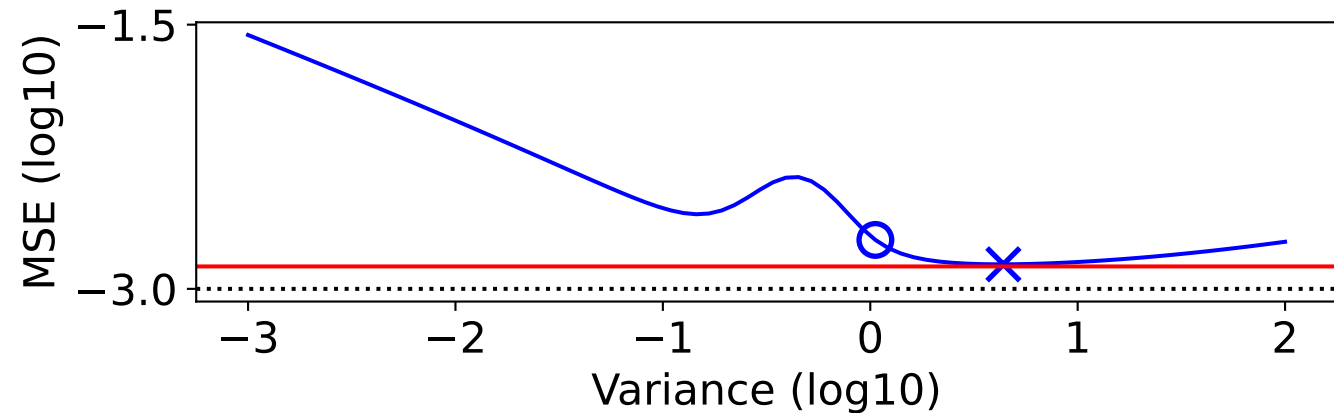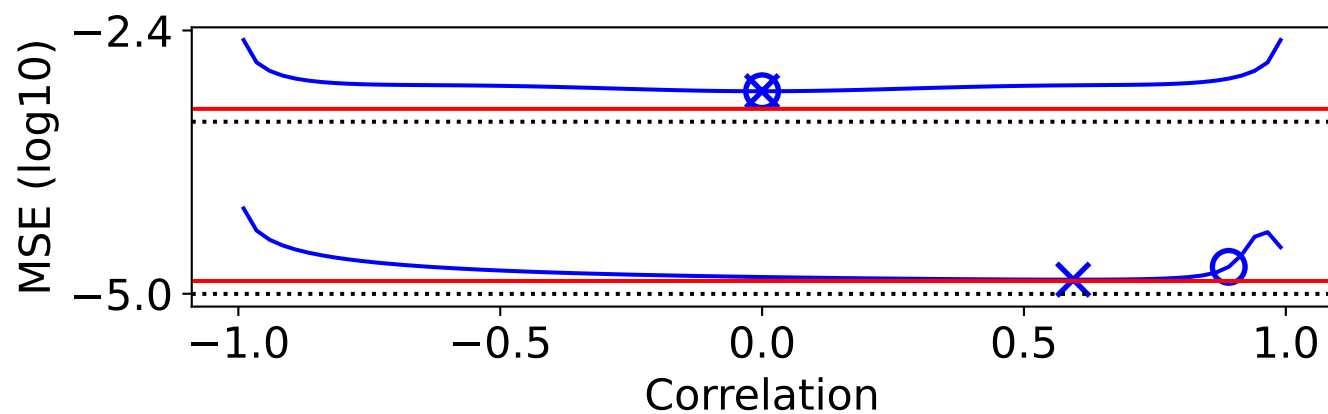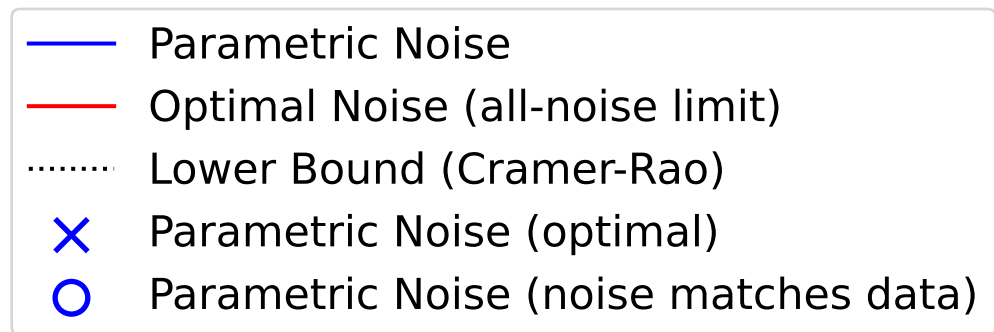

Supplement: supplementary_material [file attachment]

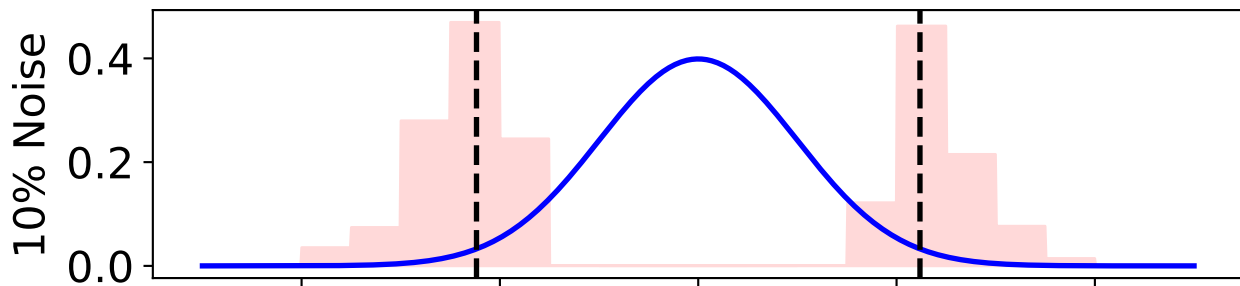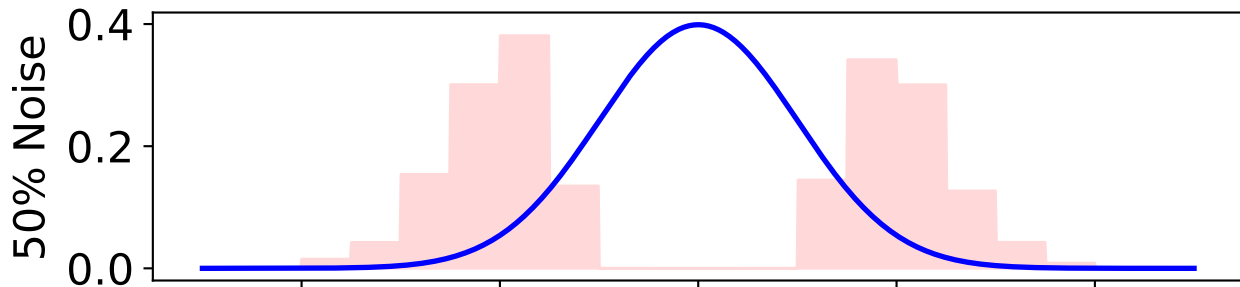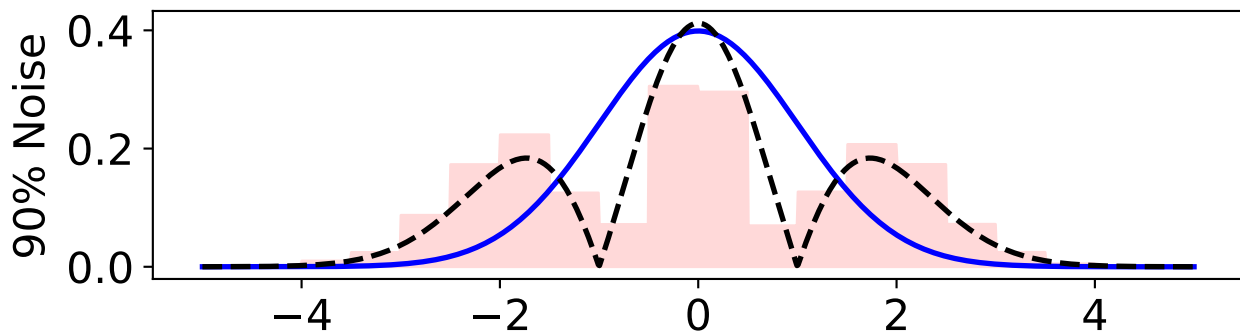

— data    --- noise (predicted)    noise

Supplement: supplementary_material [file attachment]

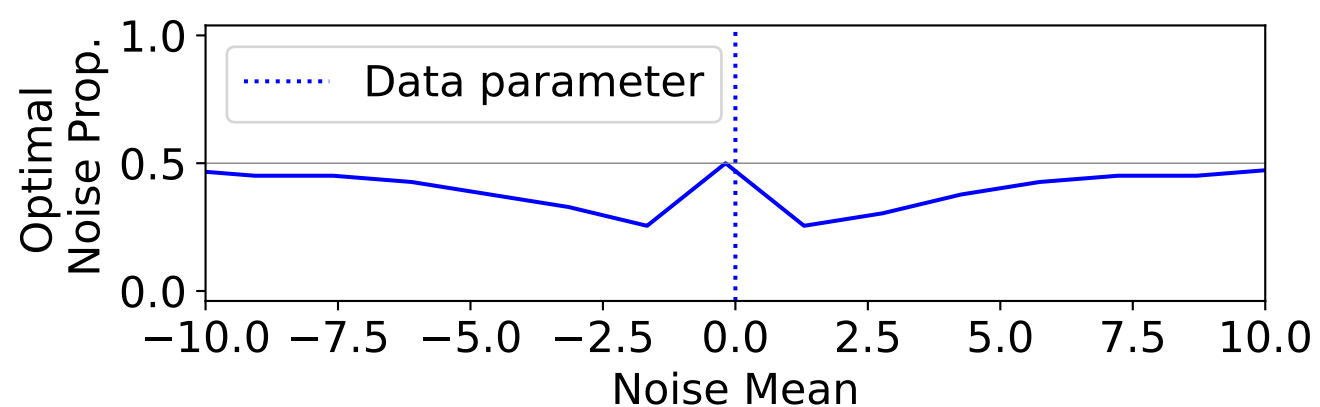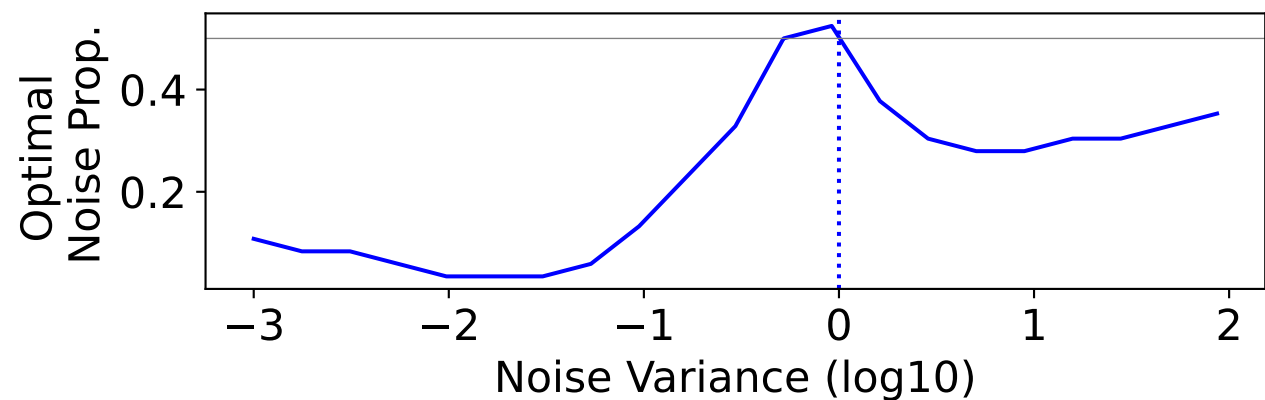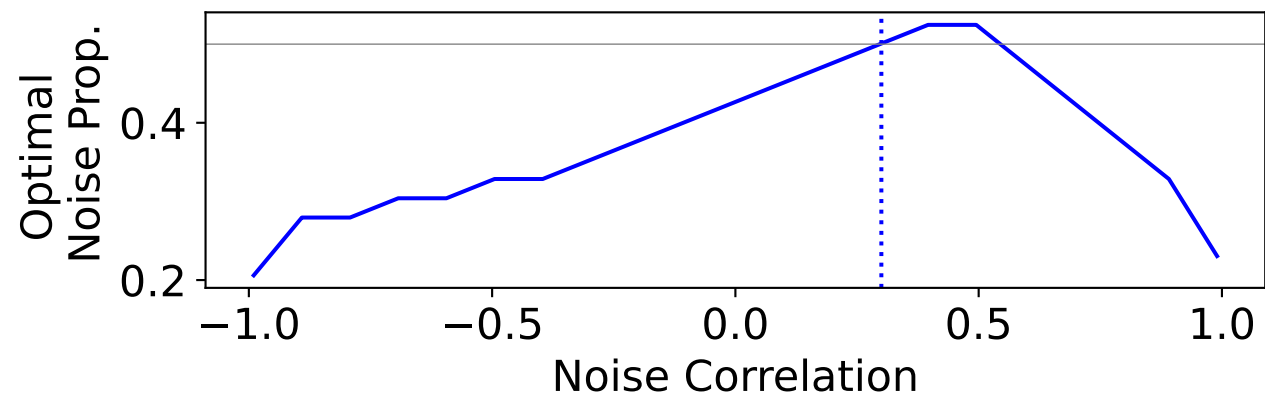

Supplement: supplementary_material [file attachment]

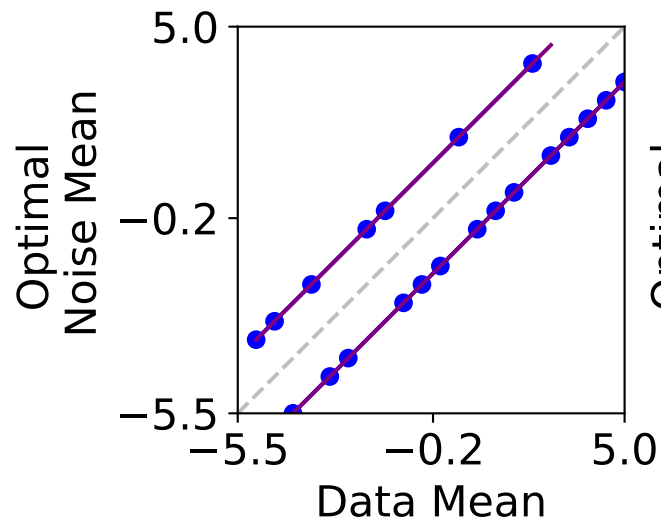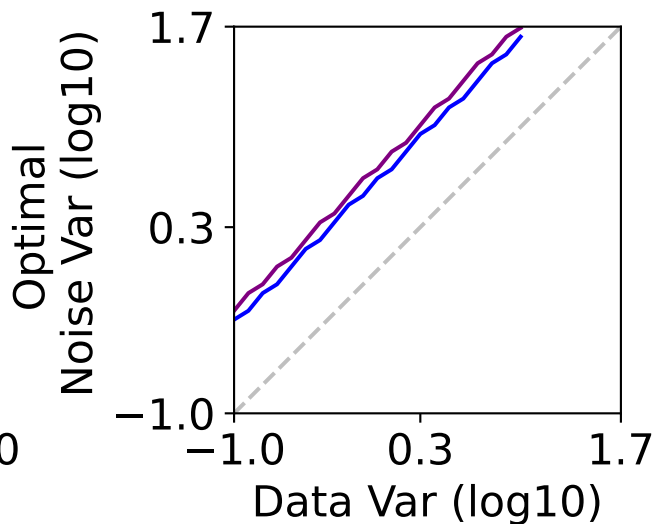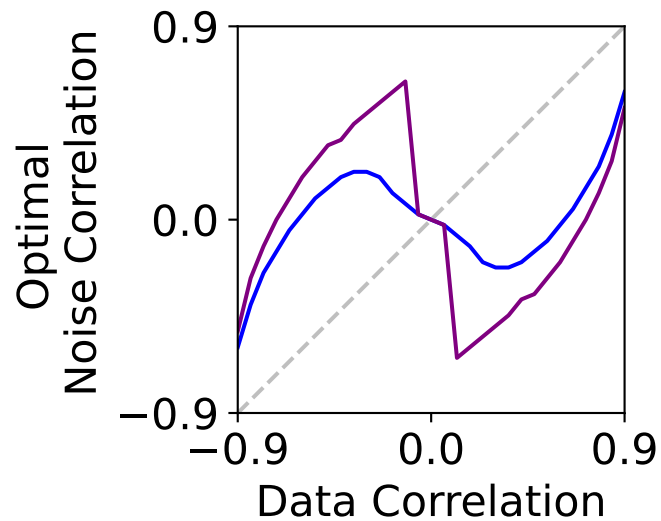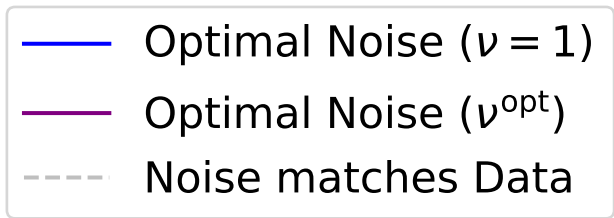

Supplement: supplementary_material [file attachment]

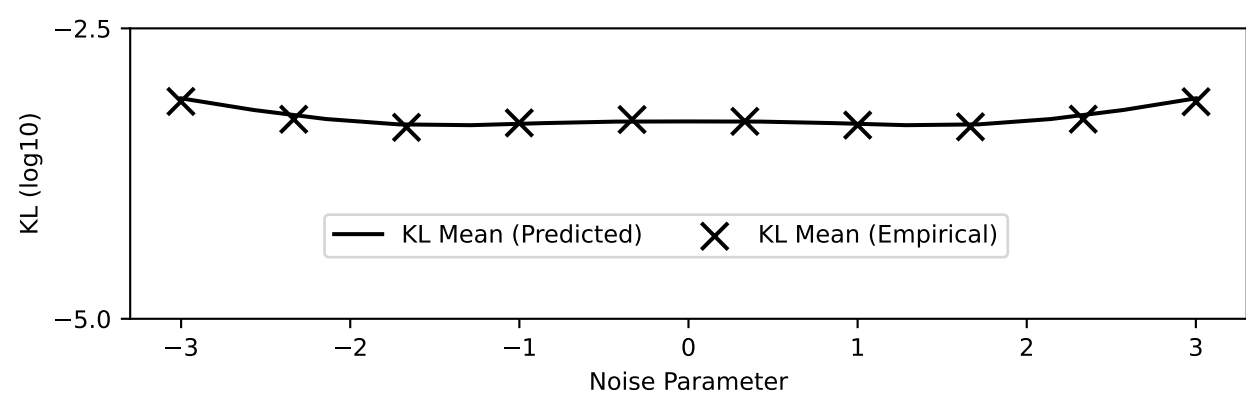

Supplement: supplementary_material [file attachment]

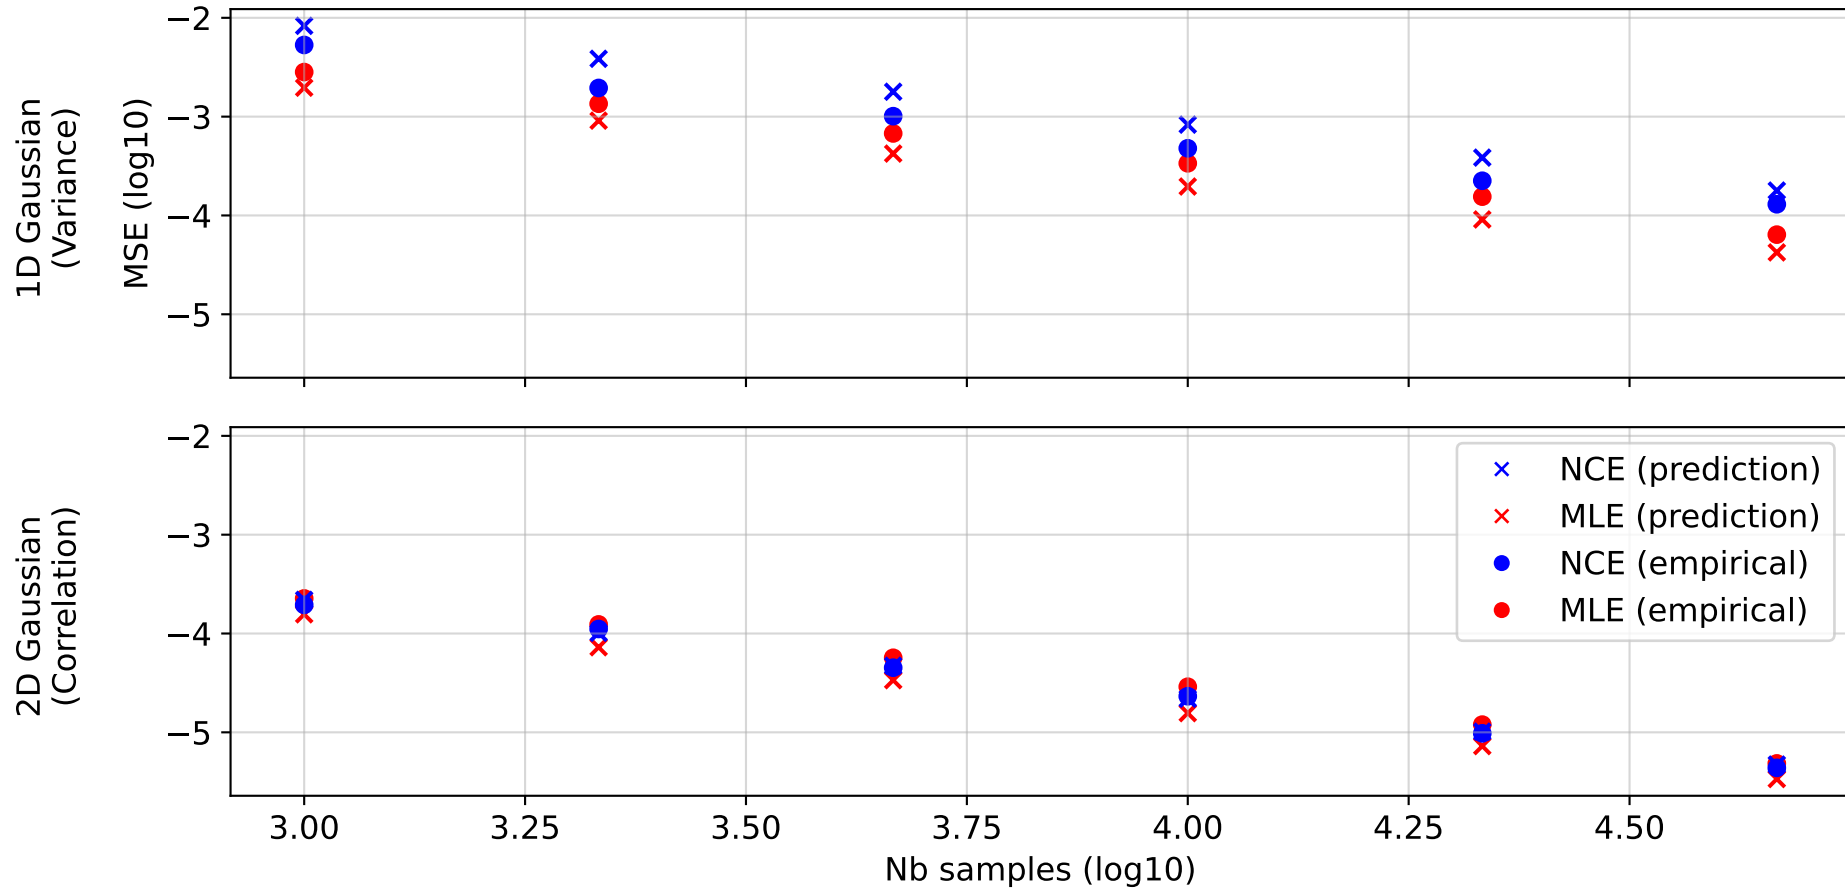

Supplement: supplementary_material [file attachment]
